# Supplementary material
Source: Research Square preprint supplement (doi:10.21203/rs.3.rs-9592761/v1)
Supplement: Supplementary file 1 [file f4afdb3d3e75ef7d3eae8b44.pdf]

# SUPPLEMENT MATERIAL for: Dynamic Group-Aware Bayesian Shrinkage and Redundancy-Aware Screening in Spatial Panel Models

## 1 Spatial Units and Candidate Variables

Table 1 reports the spatial units included in the empirical panel, while Table 2 reports the candidate covariates used after alignment with the empirical specification and their group assignments. These groups define the hierarchical shrinkage structure used in the Bayesian model; posterior relevance and redundancy-aware pruning are then determined from the estimated model.

**Table 1:** Spatial units included in the empirical panel.

|          |         |           |             |
|----------|---------|-----------|-------------|
| Austria  | Belgium | Lithuania | Luxembourg  |
| Bulgaria | Croatia | Malta     | Netherlands |
| Cyprus   | Czechia | Norway    | Poland      |
| Denmark  | Estonia | Portugal  | Romania     |
| Finland  | France  | Slovakia  | Slovenia    |
| Germany  | Greece  | Spain     | Sweden      |
| Hungary  | Ireland | Italy     | Latvia      |

**Table 2:** Candidate variables and group assignments used in the empirical analysis.

| Variable              | Description                                                | Group                                 |
|-----------------------|------------------------------------------------------------|---------------------------------------|
| ren_ene_sh            | Renewable energy share                                     | renewable energy                      |
| ren_el_sh             | Renewable energy share in electricity                      | renewable energy                      |
| ren_trans_sh          | Renewable energy share in transport                        | renewable energy                      |
| renen_el_sh           | Renewables share in electricity production                 | renewable energy                      |
| elprice_h             | Household electricity price                                | energy prices                         |
| elprice_nnh           | Non-household electricity price                            | energy prices                         |
| gas_price_notax       | Gas price excluding taxes                                  | energy prices                         |
| gas_price_tax         | Gas price including taxes                                  | energy prices                         |
| pop                   | Population                                                 | macro-structural conditions           |
| gfcf_pc               | Gross fixed capital formation per capita                   | macro-structural conditions           |
| gdp_pc_gr             | GDP per capita growth                                      | macro-structural conditions           |
| el_imp                | Electricity imports                                        | energy trade and dependence           |
| ene_imp               | Energy import dependence                                   | energy trade and dependence           |
| imp_oil               | Oil and petroleum imports                                  | energy trade and dependence           |
| el_exp                | Electricity exports                                        | energy trade and dependence           |
| prod_el_renfuel       | Electricity production from renewables and biofuels        | electricity production structure      |
| prod_el_solid         | Electricity production from solid fossil fuels             | electricity production structure      |
| prod_el_fossilheat    | Electricity production from fossil heat sources            | electricity production structure      |
| prod_el_fossilheat_pc | Electricity production from fossil heat sources per capita | electricity production structure      |
| ene_intgdp_vol        | Energy intensity of GDP                                    | system efficiency and competitiveness |
| prod                  | Productivity indicator                                     | system efficiency and competitiveness |
| comp_country          | Cross-border electricity-market competitiveness indicator  | system efficiency and competitiveness |
| int_country           | Cross-border electricity-market integration indicator      | system efficiency and competitiveness |
| tot_env_taxes         | Total environmental taxes                                  | environmental and fiscal pressure     |
| ghg_tot_pc            | Total greenhouse-gas emissions per capita                  | environmental and fiscal pressure     |
| ghg_ene_pc            | Energy-related greenhouse-gas emissions per capita         | environmental and fiscal pressure     |
| ar_util_bills         | Arrears on utility bills                                   | social and housing vulnerability      |
| cost_disphouseinc_sh  | Housing costs in disposable household income               | social and housing vulnerability      |
| house_deprate_city    | Housing deprivation rate in cities                         | social and housing vulnerability      |
| house_deprate_rural   | Housing deprivation rate in rural areas                    | social and housing vulnerability      |
| risk_poverty          | Risk of poverty                                            | social and housing vulnerability      |

*Notes:* The empirical variables are obtained from the [Eurostat](#) database. Group labels refer to the domains used in the group-aware shrinkage component.

## 2 Additional Computational Diagnostics and Screening Evidence

### 2.1 MCMC Diagnostics

Table 3 reports chain-level posterior summaries and acceptance rates for the full-sample estimation (Gelman et al. 1995; Plummer et al. 2006; Brooks et al. 2011). The four chains display closely aligned posterior moments for the main quantities reported in the table. The posterior mean of  $\rho_t$  is concentrated around 0.216 across chains, while the posterior mean of  $\sigma_t^2$  ranges only from 0.668 to 0.672. The global shrinkage scale  $\tau^2$  also remains small and stable across chains. Acceptance rates are similar across chains, with average Metropolis-Hastings acceptance close to 0.594 for the log-variance block and 0.552 for the spatial autoregressive block. These summaries indicate that the posterior output is not driven by chain-specific behaviour or seed choice.

Figure 1 compares posterior credible intervals and bootstrap-based intervals for the dynamic spatial dependence parameter  $\rho_t$ . The two interval constructions support the same temporal pattern, with stronger spatial dependence in the earlier part of the sample, lower values in the middle years, and a partial increase towards the end. Bootstrap intervals are wider in some periods, but they do not change the interpretation of the estimated spatial-dependence path.

**Table 3:** Chain-level MCMC summary statistics and acceptance rates for the full-sample estimation.

| Chain   | Seed | Elapsed sec. | $\bar{\rho}$ | $\text{sd}(\rho)$ | $\bar{\sigma}^2$ | $\text{sd}(\sigma^2)$ | $\bar{\tau}^2$ | Acc. SV | Acc. $\rho$ |
|---------|------|--------------|--------------|-------------------|------------------|-----------------------|----------------|---------|-------------|
| chain_1 | 2025 | 30839.66     | 0.217        | 0.129             | 0.668            | 1.333                 | 0.001          | 0.594   | 0.552       |
| chain_2 | 2026 | 30448.86     | 0.216        | 0.130             | 0.671            | 1.348                 | 0.002          | 0.594   | 0.551       |
| chain_3 | 2027 | 28502.90     | 0.217        | 0.130             | 0.672            | 1.352                 | 0.002          | 0.594   | 0.552       |
| chain_4 | 2028 | 28901.19     | 0.217        | 0.130             | 0.672            | 1.344                 | 0.002          | 0.594   | 0.552       |

*Notes:* The table reports chain-specific posterior means, posterior standard deviations, elapsed computing time, and average Metropolis-Hastings acceptance rates for the stochastic-variance and spatial-autoregressive updates.

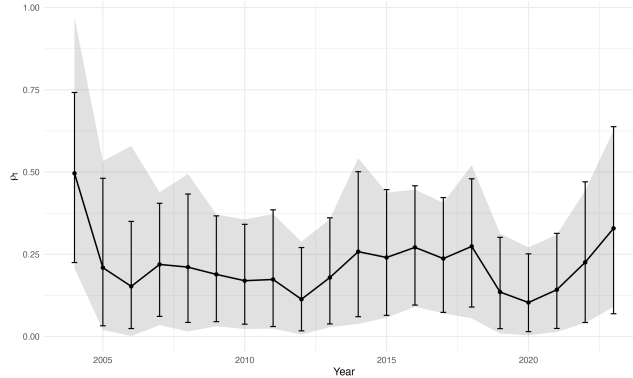

**Fig. 1:** Uncertainty diagnostics for the time-varying spatial dependence parameter  $\rho_t$ . The solid line denotes the posterior mean, the shaded region denotes posterior credible intervals, and the vertical bars denote bootstrap-based intervals.

Figure 2 reports posterior densities for average spatial dependence, average observational variance, the global shrinkage scale, and the group-specific shrinkage scales. The marginal posterior distributions are unimodal and show no irregular shapes. Average spatial dependence is concentrated on positive values, while the variance and shrinkage-scale distributions show the expected right-tail behaviour of positive parameters.

Figure 3 provides diagnostics for the group-specific shrinkage scales  $\phi_g^2$ . Posterior locations differ across groups, with larger values for system efficiency and competitiveness, energy trade and dependence, and electricity production structure. The trace plots show some local variability, but no persistent separation across chains or systematic drift, supporting the stability of the group-aware shrinkage component.

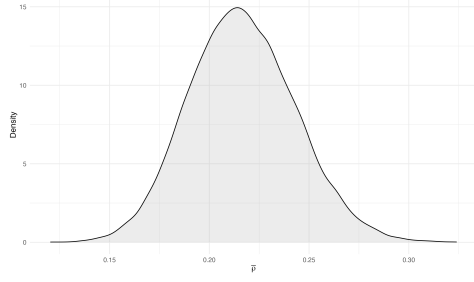

(a) Average spatial dependence.

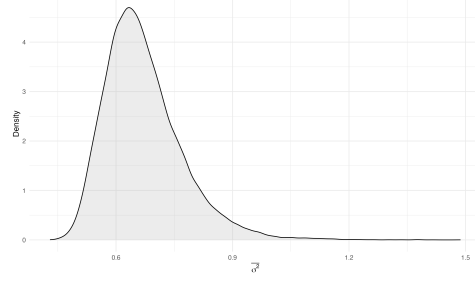

(b) Average observational variance.

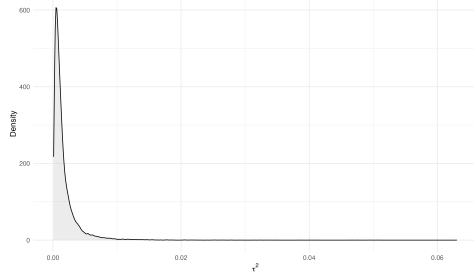

(c) Global shrinkage scale  $\tau^2$ .

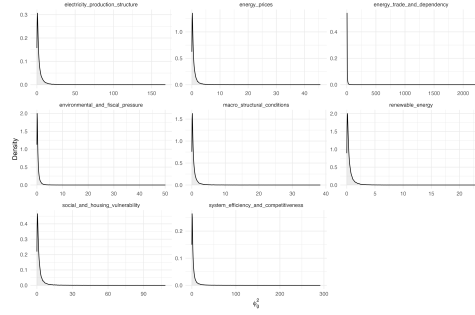

(d) Group-specific shrinkage scales  $\phi_g^2$ .

**Fig. 2:** Posterior densities of the main shrinkage and dependence components.

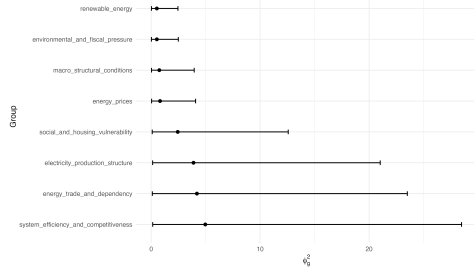

(a) Posterior summaries for  $\phi_g^2$ .

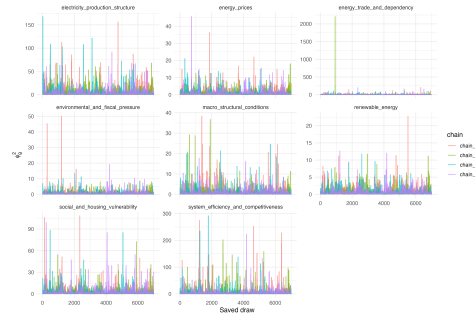

(b) Trace plots for  $\phi_g^2$ .

**Fig. 3:** Diagnostics for the group-specific shrinkage scales  $\phi_g^2$ . Panel (a) reports posterior means and 95% credible intervals. Panel (b) reports the corresponding trace plots.

## 2.2 Group-Level Screening Summaries

Table 4 reports additional group-level summaries of posterior relevance, signal intensity, and group-specific shrinkage. The table links the relevance structure from DPRP-based screening to the hierarchical shrinkage layer estimated in the Bayesian model.

The strongest average posterior relevance is found for social and housing vulnerability, followed by energy prices. By contrast, energy trade and dependence, electricity production structure, and system efficiency and competitiveness display larger posterior values of  $\phi_g^2$ , indicating greater dynamic flexibility for these groups. Posterior relevance and group-level shrinkage intensity therefore capture related but distinct features of the fitted model.

**Table 4:** Group-level summary of dynamic posterior relevance and group-specific shrinkage.

| Group                                 | No. vars. | DPRP mean | DPRP median | Signal mean | $\phi_g^2$ mean | $\phi_g^2$ median |
|---------------------------------------|-----------|-----------|-------------|-------------|-----------------|-------------------|
| Social and housing vulnerability      | 5         | 0.960     | 0.998       | 6.950       | 2.441           | 1.204             |
| Energy prices                         | 4         | 0.908     | 0.893       | 2.957       | 0.816           | 0.412             |
| Energy trade and dependence           | 4         | 0.788     | 0.827       | 4.586       | 4.201           | 1.530             |
| Electricity production structure      | 4         | 0.783     | 0.814       | 3.002       | 3.887           | 1.793             |
| Environmental and fiscal pressure     | 3         | 0.757     | 0.793       | 1.963       | 0.524           | 0.269             |
| Renewable energy                      | 4         | 0.683     | 0.630       | 1.600       | 0.524           | 0.283             |
| System efficiency and competitiveness | 4         | 0.652     | 0.554       | 1.702       | 4.968           | 1.915             |
| Macro-structural conditions           | 3         | 0.597     | 0.549       | 0.996       | 0.750           | 0.347             |

*Notes:* Group-level DPRP statistics are obtained by aggregating variable-level posterior relevance measures within each group. Signal mean denotes the average signal-to-threshold ratio. The last two columns report posterior summaries of the group-specific shrinkage scale  $\phi_g^2$ .

## 2.3 Sign and Selection Stability under Top-1 and Top-2 Refits

Table 5 reports sign and selection stability under the *top-1* and *top-2* refits. In the *top-1* refit, `risk_poverty`, `el_imp`, `imp_oil`, and `house_deprate_rural` remain sign-stable, while `ren_ene_sh` is less stable under the more compact reduction. In the *top-2* refit, the most stable variables are `risk_poverty`, `prod`, `el_imp`, `house_deprate_rural`, and `house_deprate_city`. Other retained predictors remain relevant but are more sensitive to the reduced specification considered.

Overall, the evidence identifies a stable core of vulnerability, electricity-import, and productivity-related predictors, while the remaining *top-2* variables are more sensitive to the refitted specification.

**Table 5:** Sign and selection stability under the *top-1* and *top-2* refits.

| Spec. | Variable            | Sign share | Full DPRP | Reduced DPRP | DPRP diff. | Reduced $ \beta $ |
|-------|---------------------|------------|-----------|--------------|------------|-------------------|
| top-1 | risk_poverty        | 1.000      | 1.000     | 1.000        | 0.000      | 0.676             |
| top-1 | el_imp              | 1.000      | 0.998     | 1.000        | 0.001      | 0.235             |
| top-1 | imp_oil             | 1.000      | 0.999     | 0.990        | -0.009     | 0.109             |
| top-1 | house_deprate_rural | 1.000      | 0.999     | 0.958        | -0.041     | 0.097             |
| top-1 | ren_ene_sh          | 0.000      | 0.967     | 0.570        | -0.397     | 0.014             |
| top-2 | risk_poverty        | 1.000      | 1.000     | 1.000        | 0.000      | 0.601             |
| top-2 | prod                | 1.000      | 0.999     | 1.000        | 0.001      | 0.217             |
| top-2 | el_imp              | 1.000      | 0.998     | 1.000        | 0.001      | 0.269             |
| top-2 | house_deprate_rural | 1.000      | 0.999     | 1.000        | 0.001      | 0.289             |
| top-2 | house_deprate_city  | 1.000      | 0.998     | 1.000        | 0.001      | 0.232             |
| top-2 | prod_el_solid       | 0.000      | 1.000     | 0.877        | -0.122     | 0.066             |
| top-2 | ren_ene_sh          | 0.000      | 0.967     | 0.864        | -0.102     | 0.046             |
| top-2 | imp_oil             | 1.000      | 0.999     | 0.754        | -0.245     | 0.049             |
| top-2 | gas_price_notax     | 0.000      | 0.957     | 0.588        | -0.369     | 0.014             |

*Notes:* Sign share denotes the share of time periods in which the coefficient sign agrees between the full and reduced refits. Reduced DPRP is the mean DPRP under the refitted reduced specification. DPRP diff. is the difference between reduced-model and full-model DPRP means.

## 2.4 Threshold-Robust Group-Level Screening Patterns

Table 6 summarises how the group structure represented in the baseline *top-2* specification changes when the practical-significance threshold is varied. The table is restricted to groups represented in the preferred *top-2* model.

The social and housing vulnerability group remains the most robust block across threshold values. It contributes three selected variables under  $c = 0.5$  and  $c = 1.0$ , and two variables under the stricter threshold  $c = 1.5$ . Energy trade and dependence also remains represented under the stricter threshold, although with fewer selected variables. By contrast, renewable energy, energy prices, and electricity production lose their selected representatives when  $c$  is raised to 1.5. The contraction under the stricter rule is therefore structured, preserving the most persistent social-vulnerability and external-exposure components.

**Table 6:** Group-level robustness of the *top-2* specification under alternative practical-significance thresholds.

| $c$ | Group                                 | Top-2 selected | Avg. DPRP | Avg. signal | Avg. abs. $\beta$ |
|-----|---------------------------------------|----------------|-----------|-------------|-------------------|
| 0.5 | Electricity production structure      | 1              | 0.891     | 6.003       | 0.301             |
| 0.5 | Energy prices                         | 1              | 0.960     | 5.913       | 0.115             |
| 0.5 | Energy trade and dependence           | 2              | 0.891     | 9.172       | 0.265             |
| 0.5 | Renewable energy                      | 1              | 0.837     | 3.201       | 0.085             |
| 0.5 | Social and housing vulnerability      | 3              | 0.982     | 13.901      | 0.291             |
| 0.5 | System efficiency and competitiveness | 1              | 0.819     | 3.404       | 0.156             |
| 1.0 | Electricity production structure      | 1              | 0.783     | 3.002       | 0.301             |
| 1.0 | Energy prices                         | 1              | 0.908     | 2.957       | 0.115             |
| 1.0 | Energy trade and dependence           | 2              | 0.788     | 4.586       | 0.265             |
| 1.0 | Renewable energy                      | 1              | 0.683     | 1.600       | 0.085             |
| 1.0 | Social and housing vulnerability      | 3              | 0.960     | 6.950       | 0.291             |
| 1.0 | System efficiency and competitiveness | 1              | 0.652     | 1.702       | 0.156             |
| 1.5 | Electricity production structure      | 0              | 0.677     | 2.001       | 0.301             |
| 1.5 | Energy prices                         | 0              | 0.834     | 1.971       | 0.115             |
| 1.5 | Energy trade and dependence           | 1              | 0.701     | 3.057       | 0.265             |
| 1.5 | Renewable energy                      | 0              | 0.545     | 1.067       | 0.085             |
| 1.5 | Social and housing vulnerability      | 2              | 0.931     | 4.634       | 0.291             |
| 1.5 | System efficiency and competitiveness | 1              | 0.516     | 1.135       | 0.156             |

*Notes:* *Top-2 selected* denotes the number of retained variables from each group. DPRP, signal, and absolute coefficient magnitude are averaged within group.

## 2.5 Fuzzy-Partition Robustness Diagnostics

Figure 4 reports the full membership matrix for the selected fuzzy partition, showing both dominant and partial memberships across profiles. The block structure indicates that most units have a prevailing profile, while some countries retain secondary memberships in other clusters. The partition therefore shows a clear structure without reducing all units to fully crisp assignments.

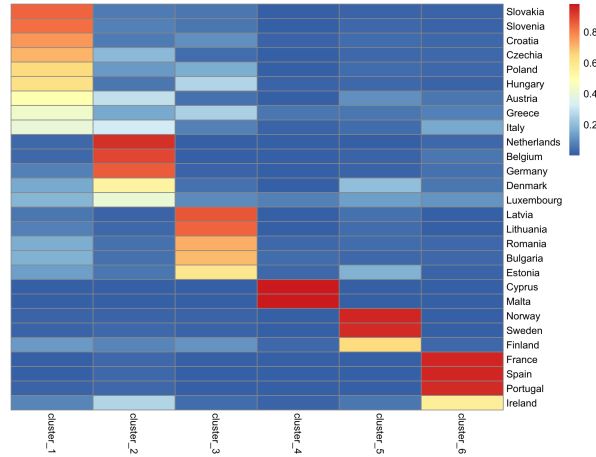

**Fig. 4:** Membership matrix under the selected spatially weighted dynamic fuzzy partition.

Table 7 and Figure 5 report cluster-overlap diagnostics between the baseline fuzzy partition and the alternative specifications. Under uniform weights, the large baseline clusters are reproduced without changes. Under the  $k = 5$  restriction, the main clusters are still identifiable, although some of them are combined. Baseline cluster 2 shows the lowest overlap, indicating greater sensitivity to the smaller number of clusters.

**Table 7:** Overlap between large baseline clusters and best-matching clusters under admissible alternatives.

| Comparison               | Baseline cl. | Size | Overlap | Precision | Jaccard |
|--------------------------|--------------|------|---------|-----------|---------|
| Baseline vs best $k = 5$ | 1            | 9    | 7       | 0.778     | 0.700   |
| Baseline vs best $k = 5$ | 2            | 5    | 3       | 0.600     | 0.333   |
| Baseline vs best $k = 5$ | 3            | 5    | 3       | 0.600     | 0.600   |
| Baseline vs best $k = 5$ | 6            | 4    | 4       | 1.000     | 0.571   |
| Baseline vs best uniform | 1            | 9    | 9       | 1.000     | 1.000   |
| Baseline vs best uniform | 2            | 5    | 5       | 1.000     | 1.000   |
| Baseline vs best uniform | 3            | 5    | 5       | 1.000     | 1.000   |
| Baseline vs best uniform | 6            | 4    | 4       | 1.000     | 1.000   |

*Notes:* Only baseline clusters with at least four units are reported. Overlap denotes the number of common units between each baseline cluster and its best-matching alternative cluster. Precision is the share of the baseline cluster recovered in the matched cluster. Jaccard overlap is computed on the union of the two sets.

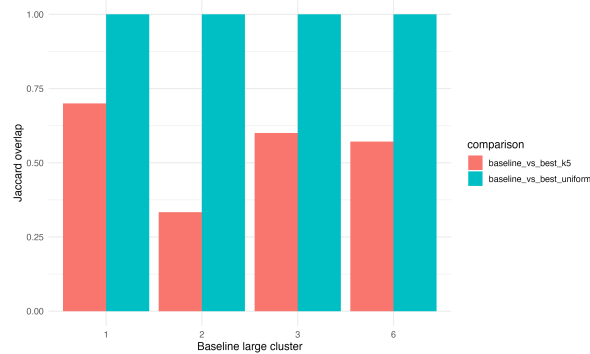

**Fig. 5:** Jaccard overlap between large baseline clusters and their best-matching counterparts under admissible alternatives.

The baseline partition also includes a two-unit cluster containing Cyprus and Malta. Table 8 reports that the two countries remain grouped together under both alternative specifications, with mean maximum membership equal to 0.975 in the baseline solution. This suggests a well-defined small profile rather than a residual or unstable grouping.

**Table 8:** Robustness of the baseline micro-cluster.

| Cluster | Units         | Mean max. memb. | Best $k = 5$ | Best uniform |
|---------|---------------|-----------------|--------------|--------------|
| 4       | Cyprus, Malta | 0.975           | Preserved    | Preserved    |

*Notes:* Preservation indicates whether the same two units remain grouped together under the corresponding alternative specification.

### 3 Additional Predictive Validation Evidence

#### 3.1 Calibration and Temporal Error Profiles

Figure 6 reports two diagnostics for the four validation models. Panel (a) compares observed and predicted values over the full validation sample. The unrestricted full model and the posterior-screened *top-2* model both reproduce the main signal in the data, while the fuzzy-interaction specification shows the closest alignment with the 45-degree line. The additive fuzzy specification does not show a visible calibration gain relative to the *top-2* benchmark. Panel (b) reports annual RMSE profiles. The fuzzy-interaction model performs particularly well over the central part of the validation period, where its RMSE is lower than that of the competing specifications for several consecutive years. Its advantage weakens in the final part of the sample, where the *top-2* benchmark becomes more competitive. This indicates that the predictive contribution of latent heterogeneous responses is relevant but time-varying.

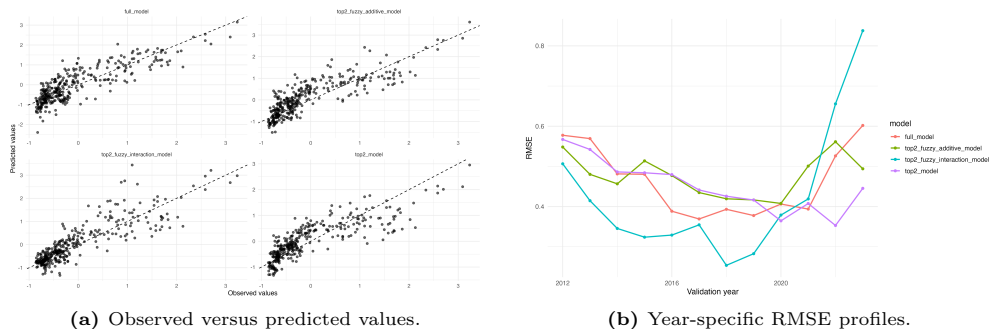

**Fig. 6:** Predictive calibration and annual RMSE profiles for the four validation models.

#### 3.2 Sensitivity to Individual Validation Years

Figure 7 reports a leave-one-year-out diagnostic. Each validation year is omitted in turn, and the percentage improvement of the fuzzy-interaction specification is recomputed relative to the full and *top-2* benchmarks.

The MAE gains remain positive regardless of which single year is removed, indicating that the improvement in typical prediction error is not driven by one validation year. RMSE gains are more sensitive to the later years of the sample. The gain relative

to the full model remains positive throughout, whereas the gain relative to the *top-2* benchmark increases when some final validation years are omitted. The pattern indicates that the fuzzy-interaction specification improves prediction over most validation years, although the gains are smaller near the end of the sample.

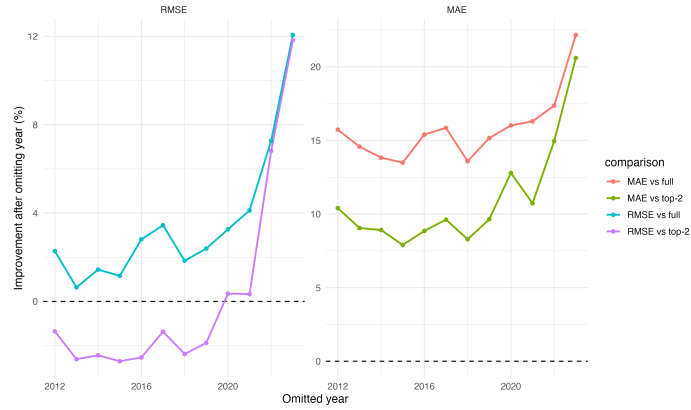

**Fig. 7:** Leave-one-year-out sensitivity analysis for the fuzzy-interaction specification.

## References

- Brooks, S., Gelman, A., Jones, G., Meng, X.-L. (eds.): Handbook of Markov Chain Monte Carlo. CRC press, Boca Raton (2011)
- Gelman, A., Carlin, J.B., Stern, H.S., Rubin, D.B.: Bayesian Data Analysis, 1st edn. Chapman and Hall/CRC, Boca Raton (1995). <https://doi.org/10.1201/9780429258411>
- Plummer, M., Best, N., Cowles, K., Vines, K.: Coda: Convergence diagnosis and output analysis for mcmc. R News **6**(1), 7–11 (2006)
